# Supplementary material for: Isolation and Characterization of the First Temperate Virus Infecting Psychrobacillus from Marine Sediments
Source: MDPI journal article supplement (doi:10.3390/v14010108), 2022-01-08
Supplement: s1 [file s1]

## Supplementary materials

**Table S1. Primers used in this study.**

| Name         | Sequence                             |
|--------------|--------------------------------------|
| 16S-27 F     | 5'-AGAGTTTGATCCTGGCTCAG-3'           |
| 16S-1492 R   | 5'-GGTTACCTTGTACGACTT-3'             |
| M13-F        | 5'-TGTAACGACGGCCAGT-3'               |
| M13-R        | 5'-CAGGAAACAGCTATGACC-3'             |
| PV1-attL F   | 5'-AGGGTCTTCTAACGCATCAATCA-3'        |
| PV1-attL R   | 5'-TTAGGAGAACCAATAGCGGTGTA-3'        |
| PV1-attR F   | 5'-TGCAGGAATAAGATTCGAGTGC-3'         |
| PV1-attR R   | 5'-AACGAGGTTCGTAATATGTTTGG-3'        |
| PVJ1-ORF75 F | 5'-CAACCCATCTAACCAAATTCCATA-3'       |
| PVJ1-ORF75 R | 5'-TGACAGTCGTAATTGCCACCC-3'          |
| PVJ1-39 F    | 5'-AATATTGTATCCATCACTACCACCACAG-3'   |
| PVJ1-13562 R | 5'-GCATAACGGCAAGAAAATCAAATTCGAAT-3'  |
| PVJ1-13292 F | 5'-ATCGATGGATTTCGTCTTTGTGATATTT-3'   |
| PVJ1-26177 R | 5'-CTATTAGAGAAATTGGAGAAGCGGTGG-3'    |
| PVJ1-25817 F | 5'-TGGATGATTAGGTATTTCAAACAATCGTGT-3' |
| PVJ1-37067 R | 5'-AAAACAGGCAAGCGTGAAGTTTTTATTG-3'   |
| PVJ1-36731 F | 5'-TCAATTAACTCATCAGATCACCTTCACT-3'   |
| PVJ1-49091 R | 5'-CGATACGTGAAAATCATCCATGGTACAC-3'   |
| PVJ1-48703 F | 5'-TCGATTGCCATTGCTCTAACTTCTCTAG-3'   |
| PVJ1-778 R   | 5'-AAAAAGCAGGTTACGAATATCCCAGTATC-3'  |
| PVJ1-qPCR F  | 5'-GATTTGAGGTAAGTCGGCTAAGAG-3'       |
| PVJ1-qPCR R  | 5'-TAGGAGAAGAAGGGTACTTGTGGA-3'       |

**Table S2. Predicted ORFs of PVJ1.**

| ORF no.<br>(orientation) | Position  | Predicted<br>function                       | BLASTP hit(s)<br>(accession no.; E value)                                                                        | Length<br>(No. of<br>residues) | Predicted<br>TMH |
|--------------------------|-----------|---------------------------------------------|------------------------------------------------------------------------------------------------------------------|--------------------------------|------------------|
| 1(-)                     | 1234-1401 | hypothetical<br>protein                     | hypothetical protein<br>JCM9152_2062 [ <i>Bacillus<br/>hemicellulosilyticus</i> JCM<br>9152] (GAE30 648.1;2e-08) | 55                             | 0                |
| 2(-)                     | 1658-2770 | hypothetical<br>protein                     | hypothetical protein<br>[ <i>Bacillus</i> sp. 522_BSPC]<br>(WP_048716486.1;2e-140)                               | 370                            | 0                |
| 3(-)                     | 2826-3215 | hypothetical<br>protein                     | hypothetical protein<br>[ <i>Psychrobacillus lasiicapitis</i> ]<br>(WP_142537303.1;3e-80)                        | 129                            | 0                |
| 4(-)                     | 3241-3411 | hypothetical<br>protein                     | hypothetical protein<br>HMPREF1210_02984<br>[ <i>Paenisporsarcina</i> sp.<br>HGH0030]<br>(EPD50136.1;1e-12)      | 56                             | 2                |
| 5(-)                     | 3451-3942 | Single-stranded<br>DNA-binding<br>protein A | single-stranded<br>DNA-binding protein<br>[ <i>Psychrobacillus lasiicapitis</i> ]<br>(WP_142538361.1; 4e-101)    | 163                            | 0                |
| 6(-)                     | 3939-4154 | hypothetical<br>protein                     | hypothetical protein<br>[ <i>Psychrobacillus</i> sp. Z8]<br>(WP_142640942.1;2e-36)                               | 71                             | 0                |
| 7(-)                     | 4201-4395 | hypothetical<br>protein                     | no significant hit                                                                                               | 64                             | 0                |
| 8(-)                     | 4459-5769 | DNA cytosine<br>methyltransferase           | DNA cytosine<br>methyltransferase<br>[ <i>Planomicrobium</i> sp.<br>MB-3u-38]<br>(WP_101802793.1;0)              | 436                            | 0                |
| 9(-)                     | 5786-5932 | hypothetical<br>protein                     | no significant hit                                                                                               | 48                             | 0                |
| 10(-)                    | 5929-6273 | hypothetical<br>protein                     | hypothetical protein<br>[ <i>Bacillus mycoides</i> ]<br>(WP_063226329.1;3e-42)                                   | 114                            | 0                |

|       |           |                                         |                                                                                                             |     |   |
|-------|-----------|-----------------------------------------|-------------------------------------------------------------------------------------------------------------|-----|---|
| 11(-) | 6263-6478 | hypothetical protein                    | hypothetical protein<br>CHI07_17015<br>[ <i>Paenibacillus</i> sp. 7884-2]<br>(PAE27897.1;2e-29)             | 71  | 0 |
| 12(-) | 6515-7027 | Holliday junction resolvase RecU        | Holliday junction resolvase<br>RecU [ <i>Psychrobacillus</i> sp.<br>FJAT-21963]<br>(WP_056828373.1;3e-108)  | 170 | 0 |
| 13(-) | 7024-7209 | hypothetical protein                    | hypothetical protein<br>C7437_1011045<br>[ <i>Psychrobacillus insolitus</i> ]<br>(PZX07923.1;1e-25)         | 61  | 0 |
| 14(-) | 7196-7363 | hypothetical protein                    | hypothetical protein<br>[ <i>Psychrobacillus</i> sp.<br>FJAT-21963]<br>(WP_056828380.1;2e-13)               | 55  | 0 |
| 15(-) | 7367-7984 | dUTPase                                 | dUTPase [ <i>Psychrobacillus lasiicapitis</i> ]<br>(WP_142538354.1;5e-143)                                  | 205 | 0 |
| 16(-) | 7981-8844 | putative RNA polymerase sigma 70 factor | hypothetical protein<br>[ <i>Psychrobacillus lasiicapitis</i> ]<br>(WP_142538353.1;2e-133)                  | 287 | 0 |
| 17(-) | 8846-9109 | hypothetical protein                    | hypothetical protein<br>[ <i>Psychrobacillus</i> sp.<br>FJAT-21963]<br>(WP_056828384.1;9e-36)               | 87  | 0 |
| 18(-) | 9106-9282 | hypothetical protein                    | hypothetical protein<br>[ <i>Lysinibacillus mangiferihumi</i> ]<br>(WP_107896777.1;3e-07)                   | 58  | 0 |
| 19(-) | 9348-9515 | hypothetical protein                    | hypothetical protein<br>HMPREF1210_01171<br>[ <i>Paenisporsarcina</i> sp.<br>HGH0030]<br>(EPD52791.1;0.002) | 55  | 0 |
| 20(-) | 9512-9652 | hypothetical protein                    | pilus assembly protein PilO<br>[ <i>Bacillus</i> sp. OxB-1]<br>(WP_144399717.1;4e-07)                       | 46  | 0 |

|       |             |                                                               |                                                                                                  |     |   |
|-------|-------------|---------------------------------------------------------------|--------------------------------------------------------------------------------------------------|-----|---|
|       |             |                                                               | hypothetical protein                                                                             |     |   |
| 21(-) | 9645-9827   | hypothetical protein                                          | C7437_1011051<br>[ <i>Psychrobacillus insolitus</i> ]<br>(PZX07929.1;2e-19)                      | 60  | 0 |
| 22(-) | 9843-10673  | replication initiator protein DnaA                            | ATP-binding protein<br>[ <i>Psychrobacillus insolitus</i> ]<br>(WP_111438536.1;2e-151)           | 276 | 0 |
| 23(-) | 10612-11406 | replication protein                                           | replication protein<br>[ <i>Staphylococcus capitis</i> ]<br>(WP_096389332.1;2e-94)               | 264 | 0 |
| 24(-) | 11422-11625 | hypothetical protein                                          | hypothetical protein<br>[ <i>Planomicrobium</i> sp.<br>MB-3u-38]<br>(WP_101801962.1;4e-09)       | 67  | 0 |
| 25(-) | 11636-12337 | Putative metallo-hydrolase YycJ                               | MBL fold metallo-hydrolase<br>[ <i>Psychrobacillus lasiicapitis</i> ]<br>(WP_142538349.1;1e-161) | 233 | 0 |
| 26(-) | 12337-13233 | recombinase RecT                                              | recombinase RecT<br>[ <i>Psychrobacillus lasiicapitis</i> ]<br>(WP_142538348.1;0)                | 298 | 0 |
| 27(-) | 13233-13511 | hypothetical protein                                          | hypothetical protein<br>[ <i>Oceanobacillus profundus</i> ]<br>(WP_118888883.1;2e-27)            | 92  | 0 |
| 28(-) | 13511-13756 | hypothetical protein                                          | hypothetical protein<br>[ <i>Psychrobacillus lasiicapitis</i> ]<br>(WP_142538347.1;5e-33)        | 81  | 0 |
| 29(-) | 13758-15752 | AAA family ATPase, putative nucleoside triphosphate hydrolase | AAA family ATPase<br>[ <i>Psychrobacillus</i> sp.<br>FJAT-21963]<br>(WP_056828403.1;0)           | 664 | 0 |
| 30(-) | 15845-16054 | hypothetical protein                                          | hypothetical protein<br>[ <i>Psychrobacillus lasiicapitis</i> ]<br>(WP_142538345.1;3e-32)        | 69  | 0 |
| 31(-) | 16057-16785 | putative anti repressor                                       | hypothetical protein<br>[ <i>Psychrobacillus</i> sp.<br>FJAT-21963]<br>(WP_056828410.1;8e-133)   | 242 | 0 |
| 32(-) | 17137-17328 | hypothetical protein                                          | hypothetical protein<br>[ <i>Lysinibacillus sphaericus</i> ]<br>(WP_069512420.1;2e-23)           | 63  | 0 |

|       |             |                                      |                                                                                                              |     |   |
|-------|-------------|--------------------------------------|--------------------------------------------------------------------------------------------------------------|-----|---|
| 33(+) | 17367-17555 | XRE family transcriptional regulator | XRE family transcriptional regulator [ <i>Bacillus megaterium</i> ] (AUO14742.1;7e-15)                       | 62  | 0 |
| 34(+) | 17744-18100 | XRE family transcriptional regulator | transcriptional regulator with XRE-family HTH domain [ <i>Psychrobacillus insolitus</i> ] (PZX07946.1;9e-57) | 118 | 0 |
| 35(-) | 18631-19803 | site-specific integrase              | site-specific integrase [ <i>Lysinibacillus sphaericus</i> ] (WP_069512418.1;0)                              | 390 | 0 |
| 36(-) | 20308-20829 | hypothetical protein                 | hypothetical protein [ <i>Lysinibacillus contaminans</i> ] (WP_053583196.1;1e-36)                            | 173 | 0 |
| 37(-) | 20880-21101 | hypothetical protein                 | hypothetical protein [ <i>Lysinibacillus</i> sp. SYSU K30002] (WP_126657363.1;2e-12)                         | 73  | 0 |
| 38(-) | 21173-21376 | hypothetical protein                 | no significant hit                                                                                           | 67  | 0 |
| 39(-) | 21411-21635 | hypothetical protein                 | hypothetical protein [ <i>Lysinibacillus</i> sp. SYSU K30002] (WP_126657362.1;2e-09)                         | 74  | 0 |
| 40(-) | 21632-22492 | hypothetical protein                 | no significant hit                                                                                           | 286 | 0 |
| 41(+) | 22687-23181 | hypothetical protein                 | hypothetical protein C7437_1011005 [ <i>Psychrobacillus insolitus</i> ] (PZX07883.1;7e-65)                   | 164 | 0 |
| 42(+) | 23186-23392 | hypothetical protein                 | no significant hit                                                                                           | 68  | 1 |
| 43(+) | 23495-24208 | stress protein                       | stress protein [ <i>Kurthia zopfii</i> ] (WP_109349344.1;1e-52)                                              | 237 | 1 |
| 44(-) | 24229-24429 | hypothetical protein                 | hypothetical protein [ <i>Psychrobacillus</i> sp. OK032] (WP_093273641.1;1e-24)                              | 66  | 0 |

|       |             |                                              |                                                                                             |     |    |
|-------|-------------|----------------------------------------------|---------------------------------------------------------------------------------------------|-----|----|
|       |             |                                              | YolD-like family protein                                                                    |     |    |
| 45(-) | 24446-24775 | YolD-like family protein                     | [ <i>Psychrobacillus</i> sp. FJAT-21963]<br>(WP_056828286.1;8e-40)                          | 109 | 0  |
|       |             |                                              | UV damage repair protein                                                                    |     |    |
| 46(-) | 24788-26047 | DNA polymerase V                             | UvrX [ <i>Psychrobacillus lasiicapitis</i> ]<br>(WP_142538397.1;0)                          | 419 | 0  |
|       |             |                                              | winged helix-turn-helix                                                                     |     |    |
| 47(-) | 26044-26247 | Transcription regulator LexA                 | transcriptional regulator [ <i>Psychrobacillus lasiicapitis</i> ]<br>(WP_142538396.1;9e-27) | 67  | 0  |
|       |             |                                              | transcriptional regulator                                                                   |     |    |
| 48(-) | 26247-26468 | putative transcriptional regulator           | [ <i>Psychrobacillus</i> sp. OK032]<br>(WP_093271147.1; 9e-29)                              | 73  | 0  |
|       |             |                                              | hypothetical protein                                                                        |     |    |
| 49(+) | 26594-27355 | putative DNA ligase C1                       | [ <i>Psychrobacillus lasiicapitis</i> ]<br>(WP_142538395.1;4e-169)                          | 253 | 0  |
|       |             |                                              | N-acetylmuramoyl-L-alanine                                                                  |     |    |
| 50(-) | 27397-28161 | Lysozyme, N-acetylmuramoyl-L-alanine amidase | amidase [ <i>Psychrobacillus lasiicapitis</i> ]<br>(WP_142538394.1;6e-143)                  | 254 | 0  |
|       |             |                                              | phage holin [ <i>Bacillus sporothermodurans</i> ]<br>(WP_066234733.1;5e-36)                 | 94  | 2  |
| 51(-) | 28155-28439 | holin                                        | hypothetical protein [ <i>Rummeliibacillus stabekisii</i> ]<br>(WP_066785529.1;1e-48)       | 146 | 1  |
| 52(-) | 28456-28896 | hypothetical protein                         | hypothetical protein [ <i>Psychrobacillus lasiicapitis</i> ]<br>(WP_142539850.1;3e-39)      | 72  | 0  |
| 53(-) | 28957-29175 | hypothetical protein                         | hypothetical protein [ <i>Bacillus jeotgali</i> ]<br>(WP_079504712.1;2e-04)                 | 74  | 0  |
| 54(-) | 29405-29629 | hypothetical protein                         | hypothetical protein [ <i>Bacillus</i> sp. FJAT-22090]<br>(WP_144535422.1;1e-66)            | 141 | 1  |
| 55(-) | 29725-30150 | hypothetical protein                         | acyltransferase [ <i>Bacillus drentensis</i> ]<br>(WP_082797500.1;5e-64)                    | 352 | 10 |
| 56(-) | 30356-31414 | acyltransferase                              |                                                                                             |     |    |

|       |             |                                                               |                                                                                                                                   |     |   |
|-------|-------------|---------------------------------------------------------------|-----------------------------------------------------------------------------------------------------------------------------------|-----|---|
| 57(-) | 31509-33509 | polygalacturonase                                             | hypothetical protein<br>[ <i>Psychrobacillus</i> sp. OK032]<br>(WP_093266492.1;4e-22)<br>DUF2313                                  | 666 | 0 |
| 58(-) | 33499-34524 | putative portal protein                                       | domain-containing protein<br>[ <i>Psychrobacillus</i> sp. OK032]<br>(WP_093266494.1;6e-82)                                        | 341 | 0 |
| 59(-) | 34539-34925 | hypothetical protein                                          | hypothetical protein<br>[ <i>Psychrobacillus</i> sp. OK032]<br>(WP_093266496.1;1e-68)                                             | 128 | 0 |
| 60(-) | 34941-35990 | baseplate J                                                   | baseplate J/gp47 family<br>protein [ <i>Geobacillus</i><br><i>stearothermophilus</i> ]<br>(WP_033016789.1;2e-106)<br>DUF2634      | 349 | 0 |
| 61(-) | 35987-36394 | hypothetical protein                                          | domain-containing protein<br>[ <i>Sporosarcina</i> sp.<br>ANT_H38]<br>(WP_149582044.1;8e-63)<br>DUF2577                           | 135 | 0 |
| 62(-) | 36394-36804 | hypothetical protein                                          | domain-containing protein<br>[ <i>Paenisporosarcina</i> sp.<br>HGH0030]<br>(WP_081637782.1;3e-56)                                 | 136 | 0 |
| 63(-) | 36744-37703 | hypothetical protein                                          | hypothetical protein<br>[ <i>Psychrobacillus</i> sp.<br>FJAT-21963]<br>(WP_056828316.1;0)                                         | 319 | 0 |
| 64(-) | 37714-38400 | LysM<br>peptidoglycan-binding<br>domain-containing<br>protein | LysM peptidoglycan-binding<br>domain-containing protein<br>[ <i>Psychrobacillus</i> sp.<br>FJAT-21963]<br>(WP_056828318.1;1e-122) | 228 | 0 |
| 65(-) | 38400-40673 | tape measure protein                                          | tape measure protein<br>[ <i>Psychrobacillus</i> sp.<br>FJAT-21963]<br>(WP_056828321.1;0)                                         | 757 | 5 |
| 66(-) | 40936-41334 | phage portal protein                                          | phage portal protein<br>[ <i>Psychrobacillus</i> sp.<br>FJAT-21963]<br>(WP_056828323.1;4e-65)                                     | 132 | 0 |

|       |             |                          |                                                                                                      |     |   |
|-------|-------------|--------------------------|------------------------------------------------------------------------------------------------------|-----|---|
| 67(-) | 41352-41816 | core tail protein        | phage tail protein<br>[ <i>Psychrobacillus</i> sp.<br>FJAT-21963]<br>(WP_056828324.1;2e-91)          | 154 | 0 |
| 68(-) | 41831-43150 | sheath tail protein      | phage tail protein [ <i>Bacillus oleronius</i> ]<br>(WP_078109550.1;0)                               | 439 | 0 |
| 69(-) | 43150-43356 | hypothetical protein     | hypothetical protein<br>[ <i>Psychrobacillus</i> sp.<br>FJAT-21963]<br>(WP_056828328.1;7e-14)        | 68  | 0 |
| 70(-) | 43540-43968 | hypothetical protein     | hypothetical protein<br>[ <i>Psychrobacillus</i> sp.<br>FJAT-21963]<br>(WP_056828329.1;3e-67)        | 142 | 0 |
| 71(-) | 43952-44347 | hypothetical protein     | HK97 gp10 family phage protein [ <i>Psychrobacillus</i> sp.<br>FJAT-21963]<br>(WP_056828331.1;2e-70) | 131 | 0 |
| 72(-) | 44347-44685 | hypothetical protein     | hypothetical protein<br>[ <i>Ammoniphilus oxalaticus</i> ]<br>(WP_120190023.1;2e-52)                 | 112 | 0 |
| 73(-) | 44705-45064 | hypothetical protein     | hypothetical protein<br>[ <i>Sporosarcina</i> sp.<br>ANT_H38]<br>(WP_149582056.1;1e-47)              | 119 | 0 |
| 74(-) | 45057-45224 | hypothetical protein     | no significant hit                                                                                   | 55  | 0 |
| 75(-) | 45266-46309 | major capsid protein     | phage capsid protein<br>[ <i>Psychrobacillus</i> sp.<br>FJAT-21963]<br>(WP_056828339.1;0)            | 347 | 0 |
| 76(-) | 46326-46685 | head decoration protein  | hypothetical protein<br>[ <i>Psychrobacillus</i> sp.<br>FJAT-21963]<br>(WP_056828341.1;3e-68)        | 119 | 0 |
| 77(-) | 46700-47305 | minor structural protein | chemotaxis protein<br>[ <i>Psychrobacillus</i> sp.<br>FJAT-21963]<br>(WP_056828343.1;4e-96)          | 201 | 0 |



|       |             |                                              |                                                                                            |     |   |
|-------|-------------|----------------------------------------------|--------------------------------------------------------------------------------------------|-----|---|
| 78(-) | 47432-47629 | hypothetical protein                         | no significant hit                                                                         | 65  | 0 |
| 79(-) | 47696-47911 | putative baseplate-J protein                 | baseplate J/gp47 family protein [ <i>Clostridium</i> sp. ASF356] (WP_004033628.1;2e-05)    | 71  | 0 |
| 80(-) | 47943-48959 | SPP1 family phage head morphogenesis protein | hypothetical protein [ <i>Bacillus azotoformans</i> ] (WP_003330933.1;9e-152)              | 338 | 0 |
| 81(-) | 48952-50391 | phage portal protein                         | phage portal protein [ <i>Psychrobacillus</i> sp. FJAT-21963] (WP_056828351.1;0)           | 479 | 0 |
| 82(-) | 50401-51723 | terminase large subunit                      | PBSX family phage terminase large subunit [ <i>Bacillus oleronius</i> ] (WP_078109561.1;0) | 440 | 0 |
| 83(-) | 51701-52585 | terminase small subunit                      | terminase small subunit [ <i>Bacillus praedii</i> ] (WP_131238737.1;6e-146)                | 294 | 0 |
| 84(-) | 52709-53140 | hypothetical protein                         | hypothetical protein [ <i>Bacillus thuringiensis</i> ] (WP_098830210.1;3e-46)              | 143 | 4 |

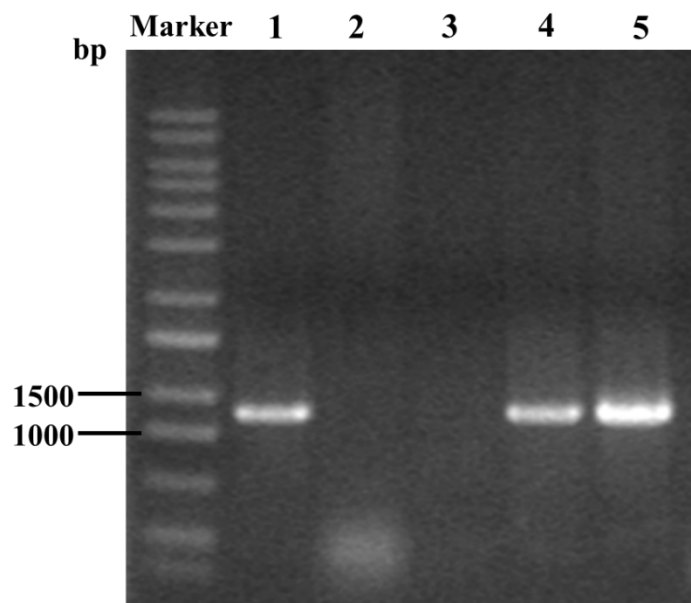

**Figure S1. Detection of the PVJ1 genome sequence in the original hydrothermal sediment sample.** Metagenomic DNA was prepared from sediment sample GC2, and used as the template for PCR reactions with the primer pair PVJ1-ORF75 F/R. The reaction products were analyzed by agarose gel electrophoresis. Lane 1, metagenomic DNA of GC2; lane 2, metagenomic DNA of SC; lane 3, deionized water; lane 4, genomic DNA of *Psychrobacillus* sp. GC2J1; lane 5, genomic DNA of PVJ1.

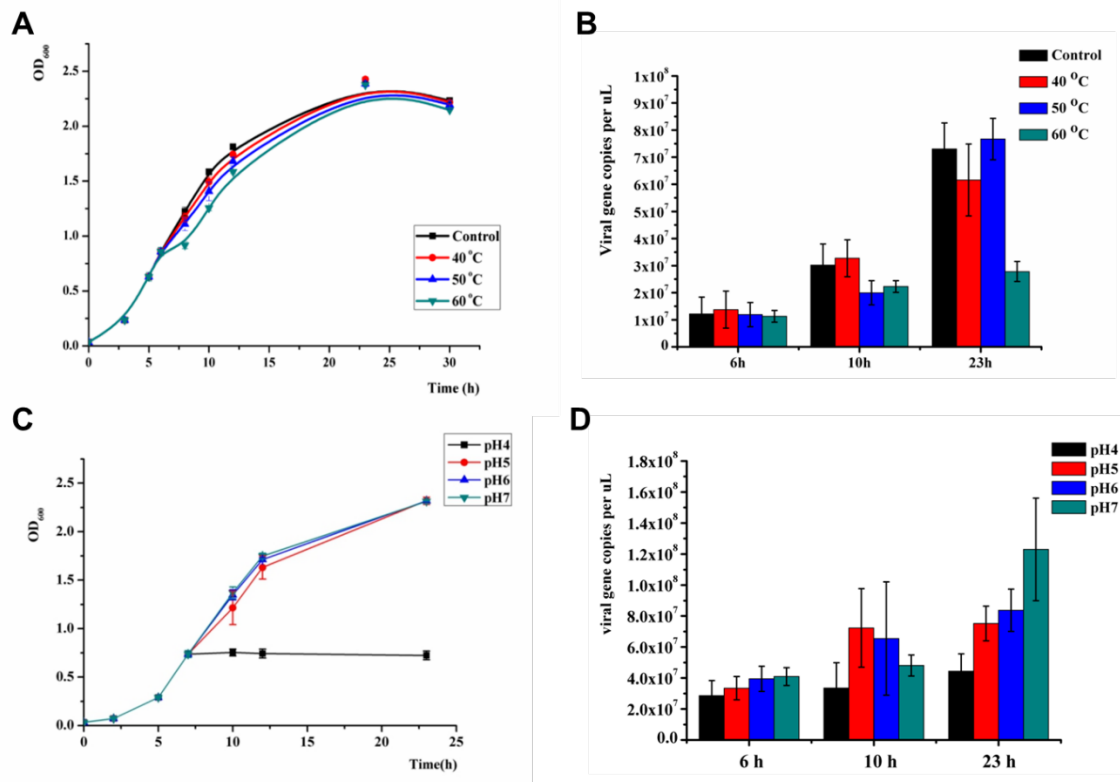

**Figure S2. Effects of temperature and pH on the growth of *Psychrobacillus* sp. GC2J1 and the titer of PVJ1.** GC2J1 was grown to an OD<sub>600</sub> of ~0.8 at 25°C and pH7. (A and B) The culture was heat-shocked for 10 min at indicated temperatures and returned to incubation at 25°C. (C and D) The pH of the culture was adjusted to indicated values, and the incubation was continued. The growth of *Psychrobacillus* sp. GC2J1 (A and C) and the PVJ1 titer (B and D) were determined.

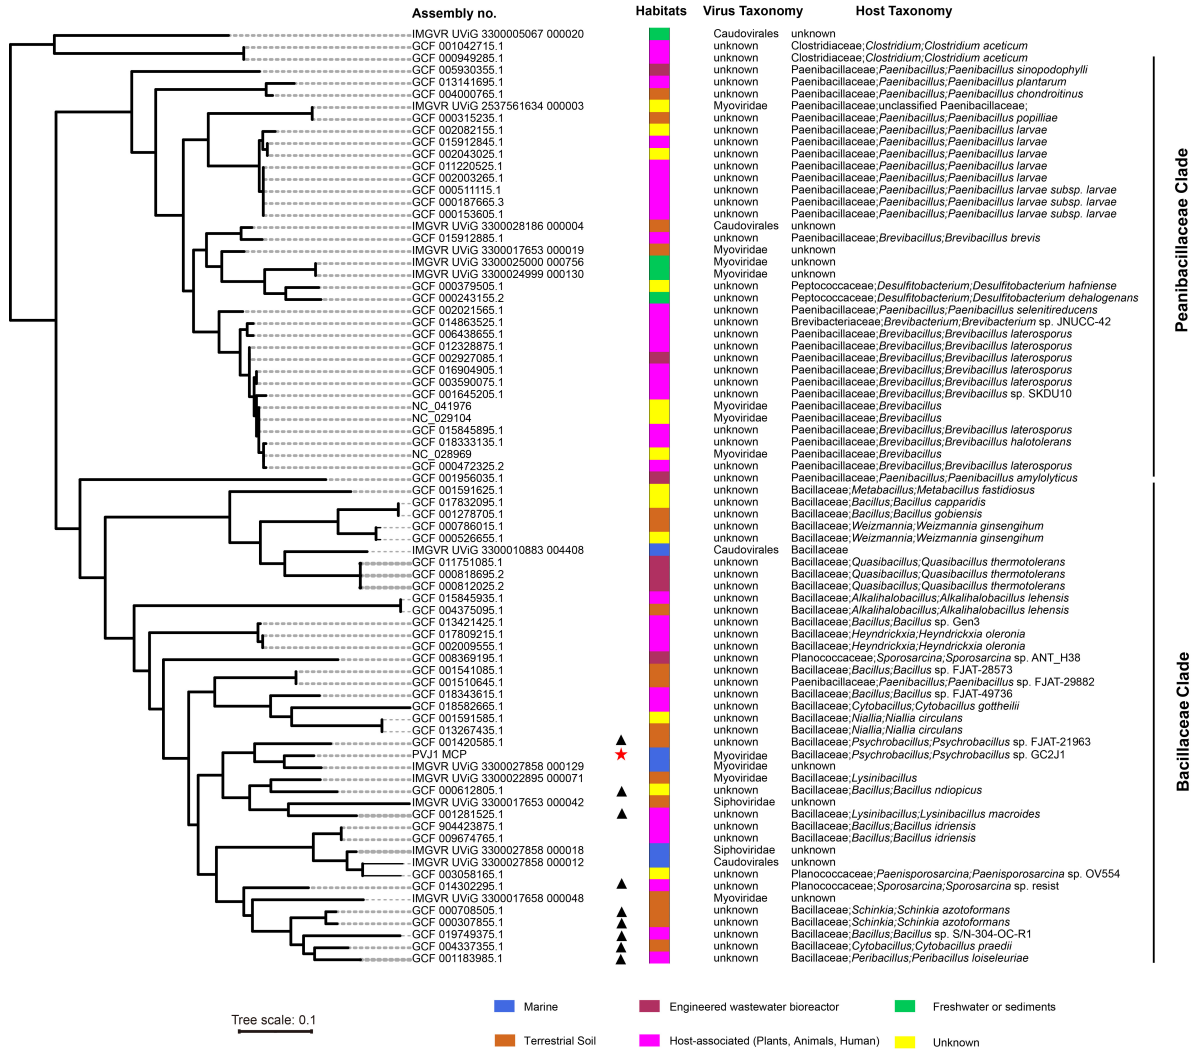

**Figure S3. Maximum likelihood (ML) phylogenetic tree of the homologues of PVJ1 MCP.** The tree was constructed based on the amino acid sequences of phage MCPs sharing  $\geq 70\%$  identity with PVJ1 MCP. The MCP of PVJ1 is marked with a red star. Phage genomes selected for synteny analysis (Figure 3) are shown by triangles. Habitats from which phage sequences were obtained are indicated. More information on the sequences is in Table S3.
